# Supplementary material for: Characterization and dark oxidation of the emissions of a pellet stove
Source: Royal Society of Chemistry journal article supplement (doi:10.1039/d3ea00070b), 2023-01-01
Supplement: d3ea00070b1.pdf [file d3ea00070b1.pdf]

1 **Characterization and dark oxidation of the emissions of a pellet**  
2 **stove**

3 Kalliopi Florou<sup>1</sup>, John K. Kodros<sup>1</sup>, Marco Paglione<sup>1,2</sup>, Spiro Jorga<sup>3</sup>, Stefania Squizzato<sup>1</sup>, Mauro  
4 Masiol<sup>1,4</sup>, Petro Uruci<sup>1,5</sup>, Athanasios Nenes<sup>1,6\*</sup>, Spyros N. Pandis<sup>1,5\*</sup>

5 <sup>1</sup>Institute of Chemical Engineering Sciences, ICE-HT, Patras, 26504, Greece

6 <sup>2</sup>Institute of Atmospheric Sciences and Climate, Italian National Research Council, Bologna 40129, Italy

7 <sup>3</sup>Department of Chemical Engineering, Carnegie Mellon University, Pittsburgh, 15213, USA

8 <sup>4</sup>Department of Environmental Sciences, Informatics and Statistics, Università Ca' Foscari Venezia, Venice, Italy

9 <sup>5</sup>Department of Chemical Engineering, University of Patras, Patras 26504, Greece

10 <sup>6</sup>School of Architecture, Civil and Environmental Engineering, Swiss Federal Institute of Technology Lausanne,  
11 Lausanne 1015, Switzerland

12 *Correspondence to:* Spyros N. Pandis (spyros@chemeng.upatras.gr), Athanasios Nenes (athanasios.nenes@epfl.ch)

13

14

15

16

17

18

19

20

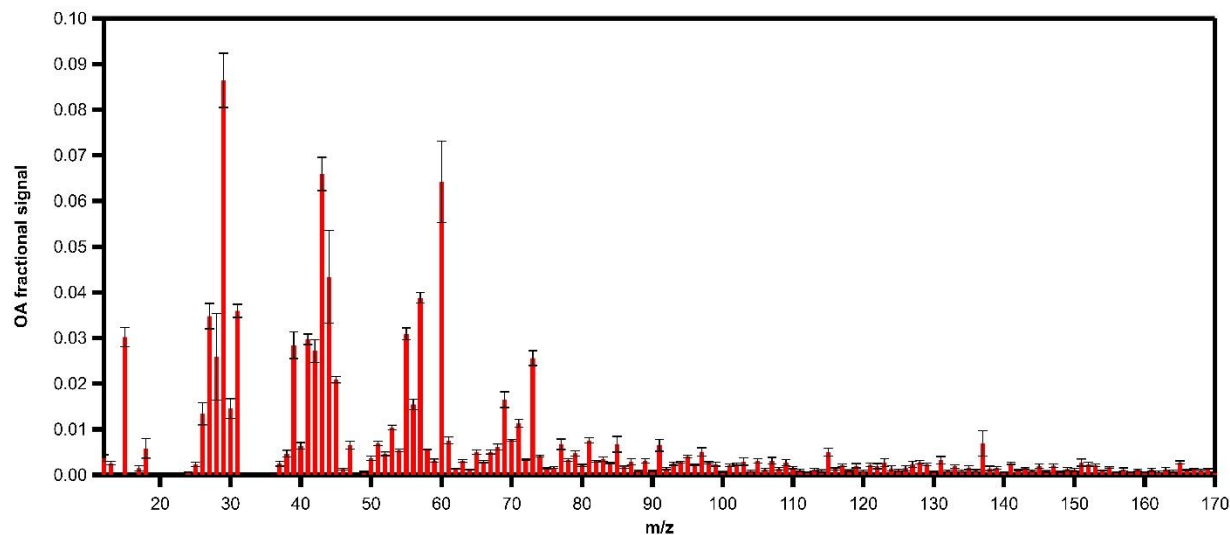

21

22 **Figure S1.** Average OA mass spectra of fresh pellet emissions (red bars) and standard deviation  
 23 (black error bars) from all experiments.

24

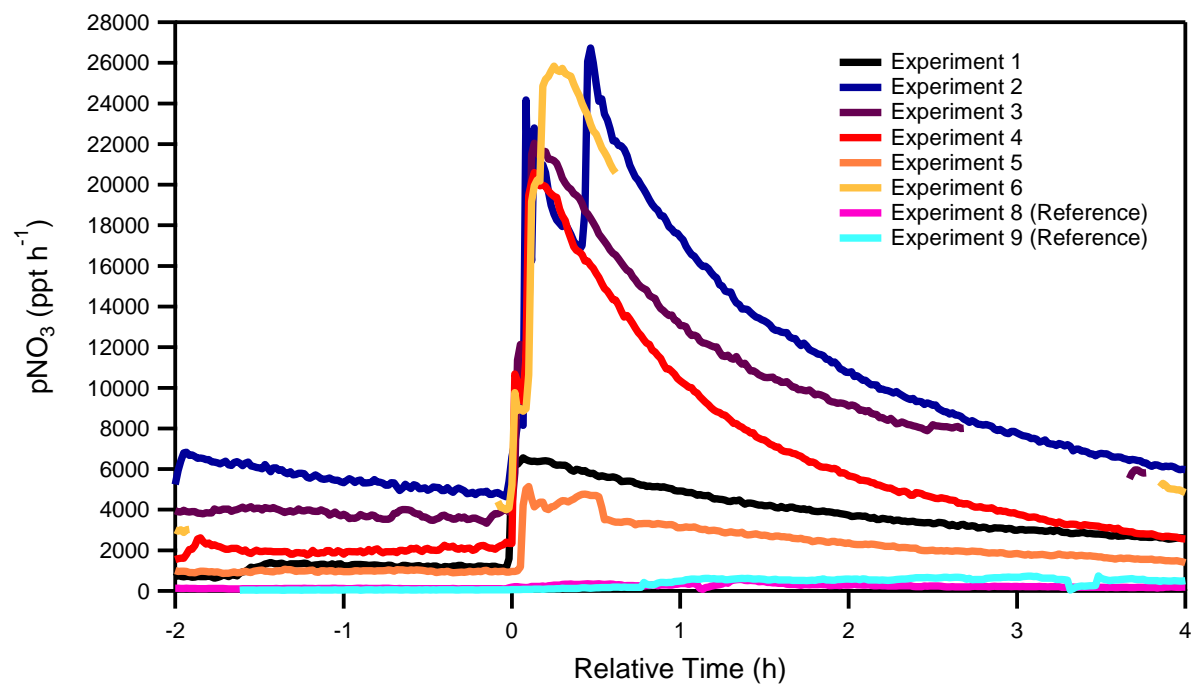

25

26 **Figure S2.** Production of nitrate radicals in ppt per h, assuming only NO<sub>2</sub>+O<sub>3</sub> reaction.

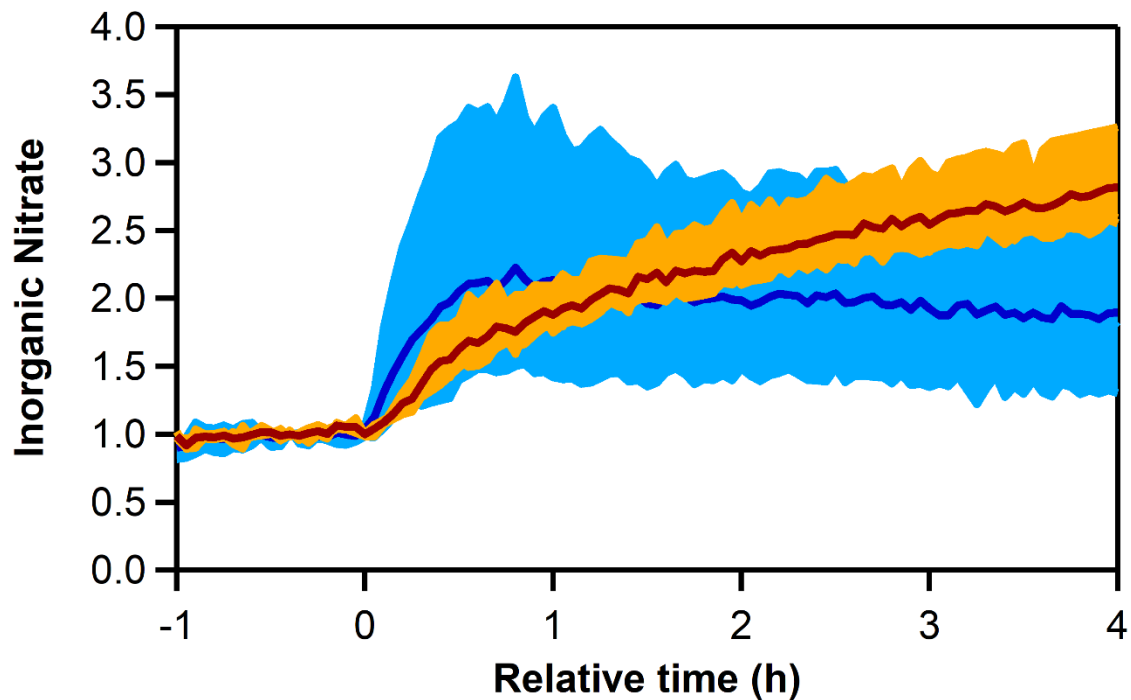

27

28 **Figure S3.** Fractional enhancement of inorganic nitrate for the dark aging experiments under dry  
 29 (brown line; experiments 1 to 3) and high RH (blue line; experiments 4 to 6). The shaded light blue  
 30 (dark high RH experiments) and orange (dark dry experiments) regions correspond to the  
 31 variability across all experiments due to differences in injected  $\text{NO}_2$  and  $\text{O}_3$  concentration, while  
 32 the solid blue and brown lines are the mean across the RH and dry experiments, respectively.

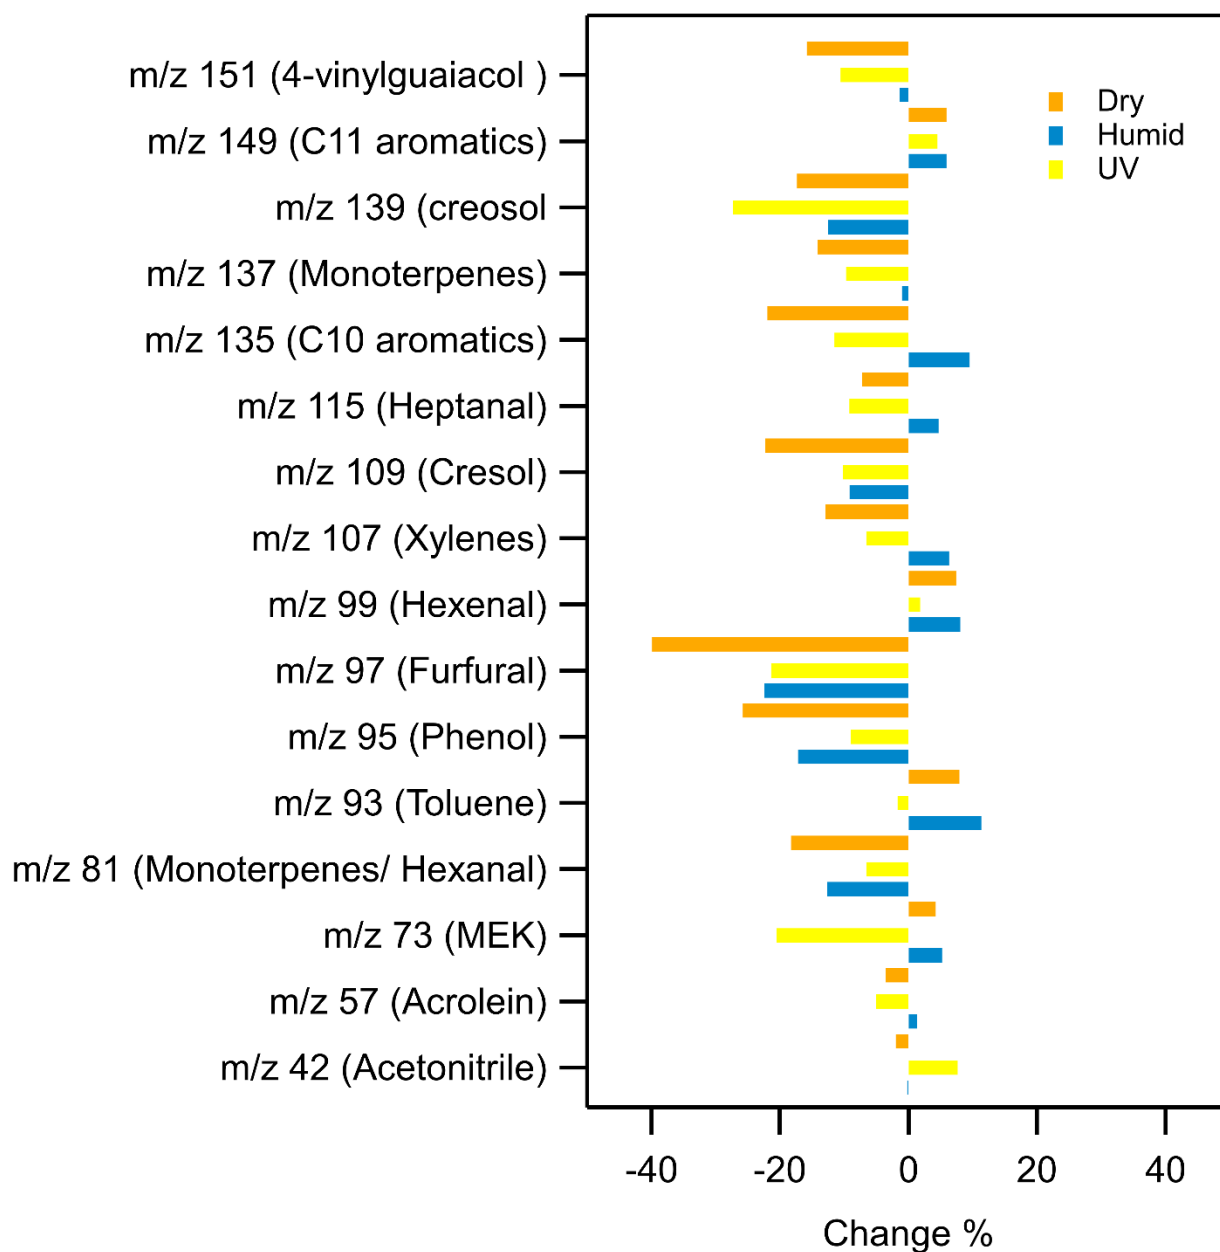

33

34 **Figure S4.** Change in concentration (in %) of certain VOCs for UV, humid and low RH  
 35 experiments after aging.

36

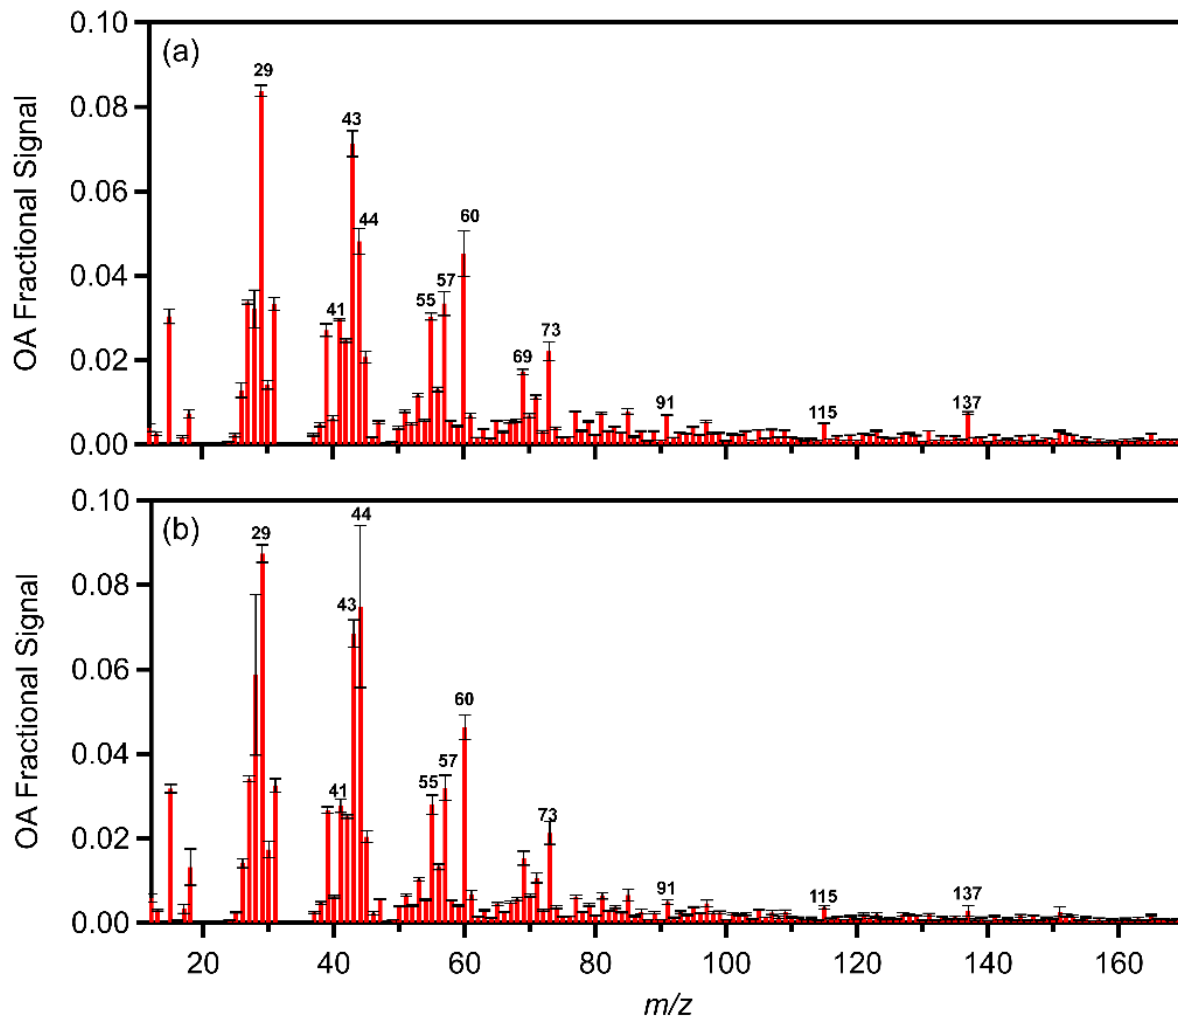

37

38 **Figure S5.** Average OA mass spectra of aged pellet emissions (red bars) and standard deviation  
 39 (black error bars) for a) low and b) high RH experiments.

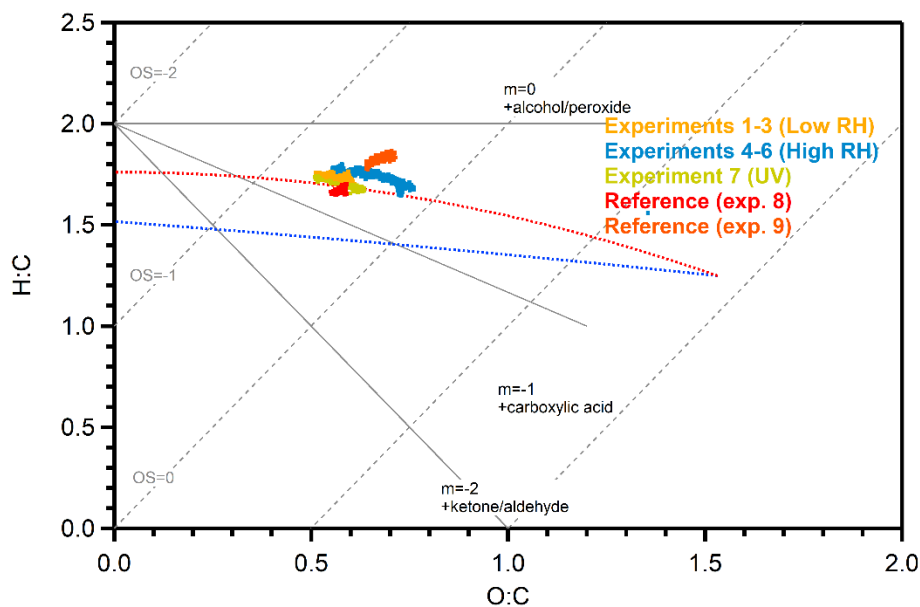

40

41 **Figure S6.** The Van Krevelen (VK) triangle diagram presents the relation of the H:C and O:C ratio  
 42 for the pellet-burning experiments shown here. The OA components from this dataset mostly fall  
 43 outside the VK-triangle region.<sup>1</sup>

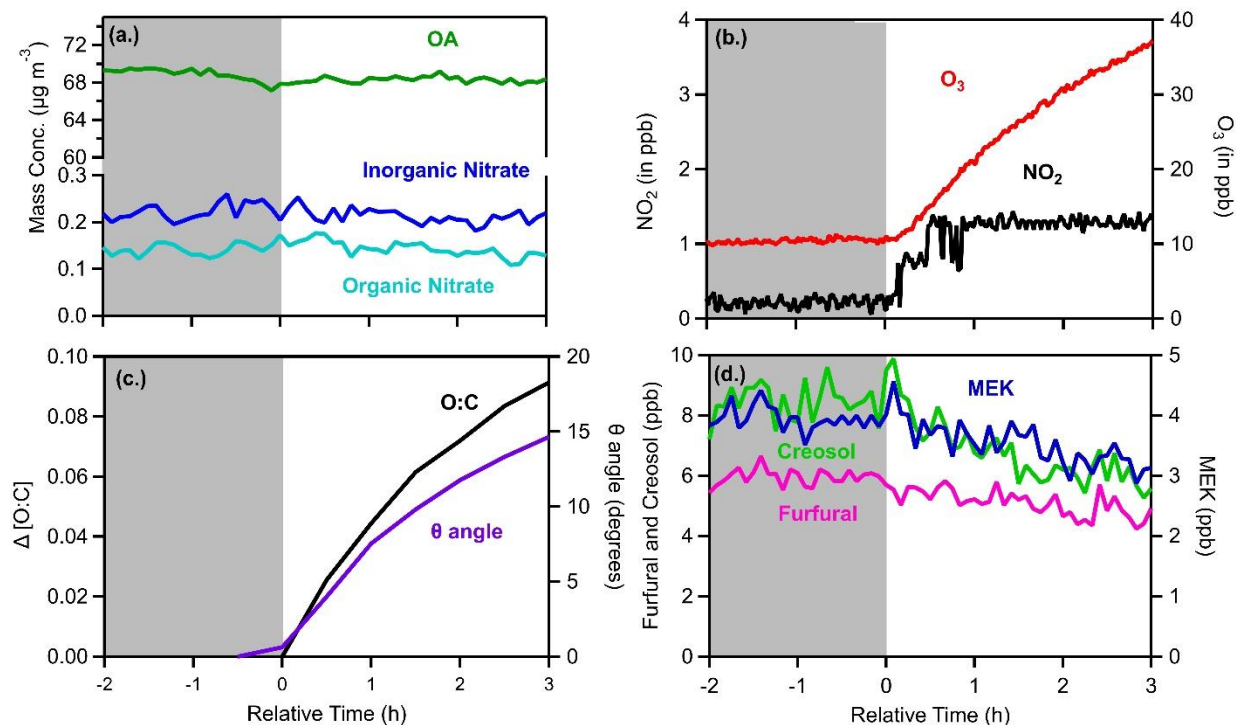

44

45 **Figure S7.** Measurements for the photooxidation (Experiment 7 in Table 1): **a)** wall-loss corrected  
 46 OA, PM inorganic nitrate, and PM organic nitrate, **b)** gas-phase species  $\text{NO}_2$ , and  $\text{O}_3$ , **c)** the change  
 47 in the O:C ratio and theta angle **d)** representative VOCs showing the largest decrease (MEK,  $m/z$   
 48 73; furfural, 97 and creosol,  $m/z$  139).

## 49 **Aerosol acidity**

50 Four different cases have been simulated and are shown here: a) Base case: measured OA and a  
51 potassium concentration estimated as 15% of the PM nitrate <sup>2</sup>; b) both OA and potassium  
52 concentrations were assumed to be zero; c) measured OA and a zero assumed potassium  
53 concentration; d) a zero assumed OA and scaled potassium concentrations.

54 For the high RH experiments, the different sensitivity tests showed that, when including  
55 neither OA water uptake nor potassium in the model (case b), the pH of the pellet aerosol stayed  
56 constant throughout the experiment for all cases with an average value of  $2.8 \pm 0.3$ . This is  
57 consistent with the fact that the inorganic components of the BB aerosol (which control the acidity  
58 in this case) is not affected by the aging process. When OA water uptake alone is included (case  
59 c), the pH of the OA decreased after ozone injection, but only in experiment 4 (Figure S5a) from  
60 3.8 to 3.1, while for experiments 5 and 6 pH was constant and equal to 3.1 for both. This indicates  
61 that the water uptake from organics in many of the experiments is not significant enough to have  
62 a large impact on nitrate/ammonium partitioning and ozone injection did not affect it. Similarly,  
63 when an estimate of potassium emissions is included (but without OA water uptake; case d), the  
64 pH decreases after  $t=0$  h, from 3.6 to 3.2 only in the case of exp. 4, while for the other two high  
65 RH experiments, pH remains constant at  $2.9 \pm 0.1$ .

66 In the low RH cases, when including neither OA water uptake nor potassium in the model  
67 (case b), the pH of the pellet aerosol stays constant for the whole experiment, and the same applies  
68 for exp. 7 (UV ref.), in which pH equals 1 even after the lights are turned on. When OA water  
69 uptake alone is included (case c), the pH of the OA increased after ozone injection for all three  
70 dark dry cases – owing to the dilution effect that the organic water has on acidity. For experiments  
71 2 and 3 (where ozone and NO<sub>2</sub> injections were higher than 100 ppb) pH increased for both from  
72 2.7 to 3.7, while in experiment 1 (under lower oxidants conditions) increased from 2.5 to 3.1. In  
73 the case where only scaled potassium is included (case d), pH remained constant for the whole  
74 experiment – reflecting that the amount and partitioning of inorganics is largely unaffected by the  
75 aging process.

76 The simulated inorganic nitrate matches the observations for the whole experiment for the  
77 base case simulation (OA water uptake and potassium are included) (Exp.4; Figure 5b), which  
78 confirms that the pH estimates here are realistic. When the OA water uptake and potassium are  
79 neglected, nitrate is underestimated by a factor of 2, but follows the trend of observations – which  
80 points to the need of including organic water in partitioning and pH calculations. Finally, when  
81 only potassium is included, inorganic nitrate is underestimated only for the period before the ozone  
82 injection and matches the measurements right after the start of dark oxidation.

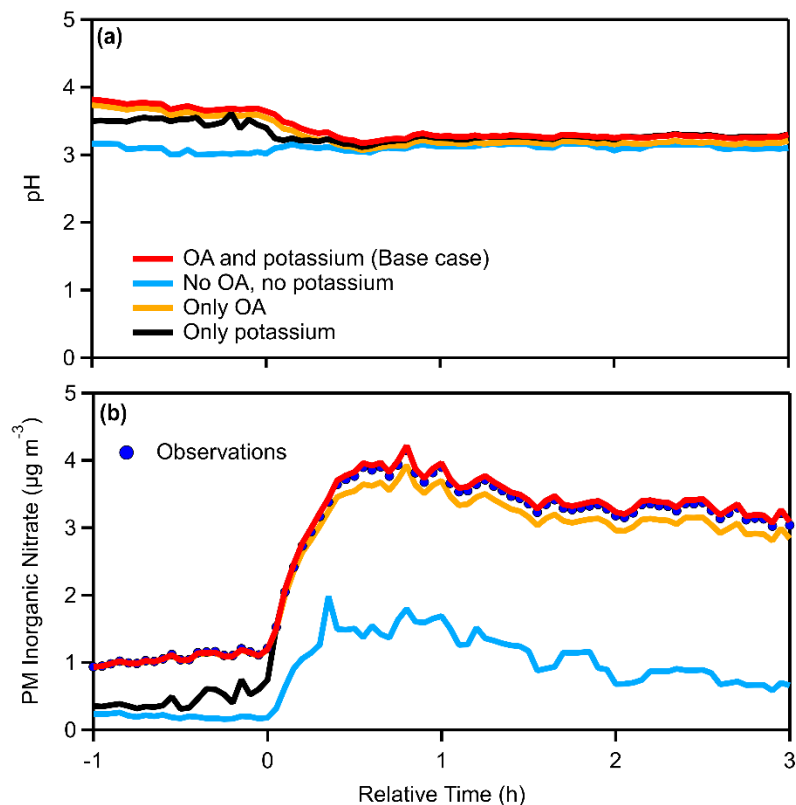

83

84 **Figure S8.** Estimated (a) aerosol pH for experiment 4 including sensitivity simulations for base  
 85 case (red), neither OA water uptake nor  $\text{K}^+$  (light blue), only OA water uptake (orange), and only  
 86 potassium (black), and (c) PM inorganic nitrate for experiment 4 for the different simulations, with  
 87 measurements from the HR-ToF-AMS presented as blue dots.

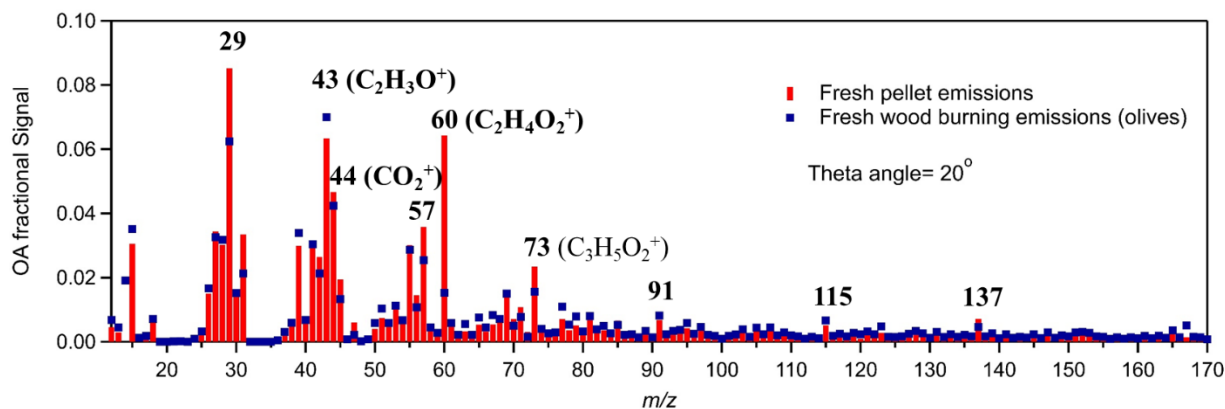

88

89 **Figure S9.** Comparison of fresh pellets (red bars; this work) and olive wood (blue squares; Kodros  
 90 et al. <sup>3</sup>) spectra.



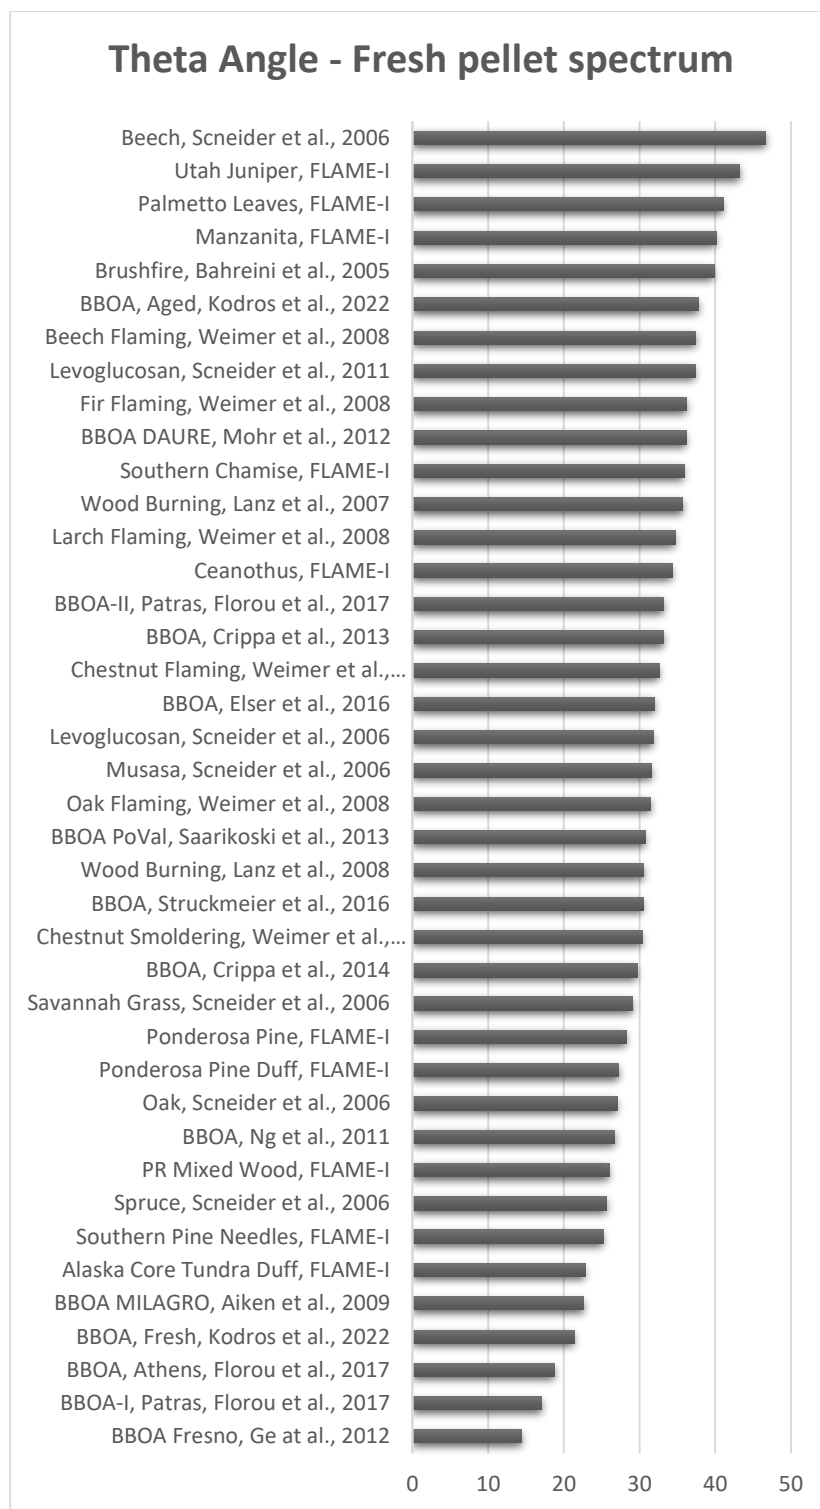

91

92 **Figure S10.** Theta angles between the fresh pellet mass spectrum and BBOA/ wood spectra from  
 93 the literature.

94 (database: Ulbrich, I.M., Handschy, A., Lechner, M., and Jimenez, J.L. High-Resolution AMS  
 95 Spectral Database. URL: <http://cires.colorado.edu/jimenez-group/HRAMSsd/>)<sup>1,3-16</sup>

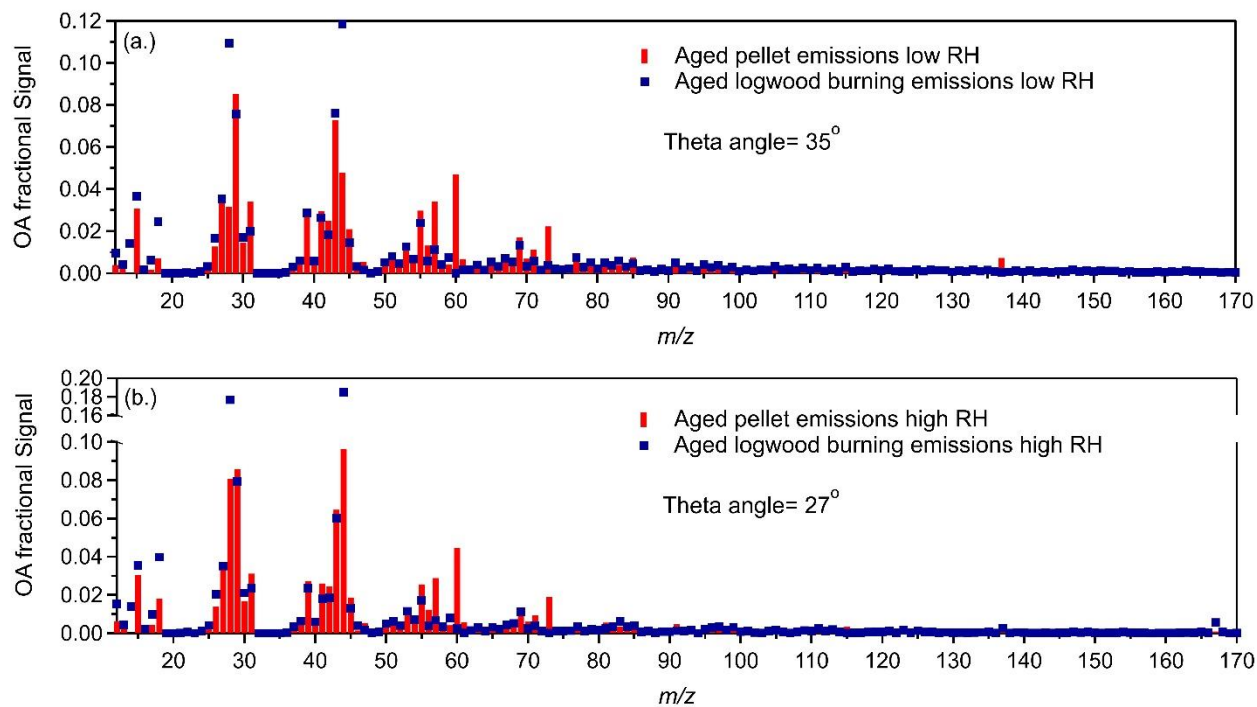

96

97 **Figure S11.** Comparison of aged pellets (red bars; this work) and olive wood (blue squares; Kodros  
 98 et al. <sup>3</sup>) spectra for a) low RH and b) high RH conditions.

99

100

101

102

103

104

105 **Table S1.** Theta angle of HR spectra during the emissions period.

| Emissions: | Exp.1 | Exp.2 | Exp.3 | Exp.4 | Exp.5 | Exp.6 |
|------------|-------|-------|-------|-------|-------|-------|
| Exp.2      | 8     |       |       |       |       |       |
| Exp.3      | 5     | 4     |       |       |       |       |
| Exp.4      | 5     | 9     | 6     |       |       |       |
| Exp.5      | 6     | 4     | 3     | 6     |       |       |
| Exp.6      | 12    | 14    | 13    | 9     | 12    |       |
| Exp.7      | 11    | 18    | 15    | 11    | 16    | 12    |

106

107 **Table S2.** Assumed reaction rate constants used to calculate typical lifetime of the VOCs with the  
 108 largest observed decrease. Reaction rate constants are taken from the listed publications and the  
 109 Master Chemical Mechanism, MCM v3.3.1<sup>17</sup>.

| Oxidant         | k_furfural                                                | k_phenol                              | k_creosol                                   | k_cresol                                    | k_a-pinene                                         |
|-----------------|-----------------------------------------------------------|---------------------------------------|---------------------------------------------|---------------------------------------------|----------------------------------------------------|
|                 | (molecule <sup>-1</sup> cm <sup>3</sup> s <sup>-1</sup> ) |                                       |                                             |                                             |                                                    |
| NO <sub>3</sub> | 9.07 x 10 <sup>-14</sup>                                  | 3.92 x 10 <sup>-12</sup>              | 2.4 x 10 <sup>-13</sup>                     | 1.4 x 10 <sup>-13</sup>                     | 2–4 x 10 <sup>-12</sup>                            |
|                 | (Newland et al., 2022) <sup>18</sup>                      | (Atkinson et al., 1992) <sup>19</sup> | (Yang et al., 2016) <sup>20</sup>           | (Atkinson et al., 1992) <sup>19</sup>       | (MCM v3.3.1)                                       |
|                 | 1.17 x 10 <sup>-12</sup>                                  |                                       |                                             |                                             |                                                    |
|                 | (Colmenar et al., 2012) <sup>21</sup>                     |                                       |                                             |                                             |                                                    |
| OH              | 3.51 x 10 <sup>-11</sup>                                  | 2.63 x 10 <sup>-11</sup>              | 9.51 x 10 <sup>-11</sup>                    | 4.3–5.9 x 10 <sup>-11</sup>                 | 3.9 x 10 <sup>-12</sup><br>3.0 x 10 <sup>-11</sup> |
|                 | (Bierbach et al., 1995) <sup>22</sup>                     | (Atkinson et al., 1992) <sup>19</sup> | (Coeur-Tourneur et al., 2010) <sup>23</sup> | (Coeur-Tourneur et al., 2010) <sup>23</sup> | (MCM v3.3.1)                                       |

110

111 **Table S3.** Average concentrations of oxidants and estimated lifetimes for the VOCs in Experiment  
 112 1.

| Oxidant         | Concentration                | τ_furfural | τ_phenol | τ_creosol | τ_cresol  | τ_a-pinene |
|-----------------|------------------------------|------------|----------|-----------|-----------|------------|
|                 | (molecule cm <sup>-3</sup> ) | (h)        |          |           |           |            |
| NO <sub>3</sub> | 5 x 10 <sup>8</sup>          | 0.5 – 6.1  | 0.14     | 2.3       | 4         | 0.28       |
|                 | 8 x 10 <sup>8</sup>          | 0.3 – 3.8  | 0.1      | 1.4       | 2.5       | 0.1        |
| OH              | 1.4 x 10 <sup>6</sup>        | 5.7        | 7.5      | 2.1       | 3.4 – 4.6 | 6.6 – 51   |

113

114 **Table S4.** Theta angle of HR spectra for the 4 h period (aged).

| After 4 h: | Exp.1 | Exp.2 | Exp.3 | Exp.4 | Exp.5 | Exp.6 |
|------------|-------|-------|-------|-------|-------|-------|
| Exp.2      | 8     |       |       |       |       |       |
| Exp.3      | 5     | 4     |       |       |       |       |
| Exp.4      | 12    | 17    | 15    |       |       |       |
| Exp.5      | 5     | 7     | 5     | 11    |       |       |
| Exp.6      | 19    | 24    | 22    | 8     | 18    |       |
| Exp.7      | 18    | 25    | 23    | 9     | 20    | 8     |

115 **Table S5.** Calculated pH for emissions and after 4 h of time zero.

|                        | pH fresh | pH after 4 h |
|------------------------|----------|--------------|
| Exp.1                  | 3.0      | 3.6          |
| Exp.2                  | 3.2      | 4.0          |
| Exp.3                  | 3.1      | 4.1          |
| Exp.4                  | 3.8      | 3.3          |
| Exp.5                  | 3.2      | 3.0          |
| Exp.6                  | 3.2      | 3.1          |
| Exp.7                  | 2.5      | 2.8          |
|                        |          |              |
| Average (exp.1-6)      | 3.2      | 3.5          |
| Average (low RH only)  | 3.1      | 3.9          |
| Average (high RH only) | 3.4      | 3.1          |

116

117 **Table S6.** Comparisons (quantified by the theta angle in degrees) of dark- dry and humid pellet spectra  
 118 from this study to AMS OA factors from literature. The same spectra are used for Fig. 9 in the main text.

| Reference                              | Location         | Factor       | Dark-Dry | Dark-Humid |
|----------------------------------------|------------------|--------------|----------|------------|
| Saarikoski et al. (2012) <sup>15</sup> | Po Valley, Italy | BBOA         | 31       | 38         |
| Florou et al. (2017) <sup>4</sup>      | Athens, Greece   | BBOA         | 16       | 24         |
| Florou et al. (2017) <sup>4</sup>      | Patras, Greece   | BBOA-I       | 13       | 23         |
| Florou et al. (2017) <sup>4</sup>      | Patras, Greece   | BBOA-II      | 31       | 29         |
| Elser et al. (2016) <sup>13</sup>      | Beijing, China   | BBOA         | 29       | 40         |
| Mohr et al. (2012) <sup>14</sup>       | Barcelona, Spain | BBOA DAURE   | 32       | 38         |
| Struckmeier et al. (2016) <sup>6</sup> | Rome, Italy      | BBOA         | 27       | 25         |
| Ge et al. (2012) <sup>7</sup>          | Fresno, USA      | BBOA         | 13       | 17         |
| Florou et al. (2017) <sup>4</sup>      | Patras, Greece   | OOA          | 43       | 30         |
| Florou et al. (2017) <sup>4</sup>      | Athens, Greece   | OOA          | 39       | 28         |
| Saarikoski et al. (2012) <sup>15</sup> | Po Valley, Italy | OOAa *       | 49       | 36         |
| Saarikoski et al. (2012) <sup>15</sup> | Po Valley, Italy | OOAb         | 41       | 28         |
| Saarikoski et al. (2012) <sup>15</sup> | Po Valley, Italy | OOAc *       | 50       | 37         |
| Docherty et al. (2011) <sup>24</sup>   | Riverside, USA   | SV-OOA SOAR  | 29       | 30         |
| Sun et al. (2011) <sup>25</sup>        | NY, USA          | OOA          | 40       | 30         |
| Crippa et al. (2013) <sup>16</sup>     | Paris, France    | OOA-BBOA2    | 28       | 20         |
| Ge et al. (2012) <sup>7</sup>          | Fresno, USA      | OOA          | 30       | 22         |
| Mohr et al. (2012) <sup>14</sup>       | Barcelona, Spain | SV-OOA DAURE | 31       | 26         |

119 \*It is not shown in Figure 9.

120

121

122

123

124 **References:**

- 125 1 N. L. Ng, M. R. Canagaratna, J. L. Jimenez, P. S. Chhabra, J. H. Seinfeld and D. R.  
126 Worsnop, Changes in organic aerosol composition with aging inferred from aerosol mass  
127 spectra, *Atmos. Chem. Phys.*, 2011, **11**, 6465–6474.
- 128 2 S. Y. Ryu, J. E. Kim, H. Zhuanshi, Y. J. Kim and G. U. Kang, Chemical composition of  
129 post-harvest biomass burning aerosols in Gwangju, Korea, *J. Air Waste Manag. Assoc.*,  
130 2004, **54**, 1124–1137.
- 131 3 J. K. Kodros, C. Kaltsonoudis, M. Paglione, K. Florou, S. Jorga, C. Vasilakopoulou, M.  
132 Cirtog, M. Cazaunau, B. Picquet-Varrault, A. Nenes and S. N. Pandis, Secondary aerosol  
133 formation during the dark oxidation of residential biomass burning emissions, *Environ. Sci.*  
134 *Atmos.*, 2022, **2**, 1221–1236.
- 135 4 K. Florou, D. K. Papanastasiou, M. Pikridas, C. Kaltsonoudis, E. Louvaris, G. I. Gkatzelis,  
136 D. Patoulias, N. Mihalopoulos and S. N. Pandis, The contribution of wood burning and  
137 other pollution sources to wintertime organic aerosol levels in two Greek cities, *Atmos.*  
138 *Chem. Phys.*, 2017, **17**, 3145–3163.
- 139 5 A. C. Aiken, D. Salcedo, M. J. Cubison, J. A. Huffman, P. F. DeCarlo, I. M. Ulbrich, K. S.  
140 Docherty, D. Sueper, J. R. Kimmel, D. R. Worsnop, A. Trimborn, M. Northway, E. A.  
141 Stone, J. J. Schauer, R. M. Volkamer, E. Fortner, B. de Foy, J. Wang, A. Laskin, V.  
142 Shutthanandan, J. Zheng, R. Zhang, J. Gaffney, N. A. Marley, G. Paredes-Miranda, W. P.  
143 Arnott, L. T. Molina, G. Sosa and J. L. Jimenez, Mexico City aerosol analysis during  
144 MILAGRO using high resolution aerosol mass spectrometry at the urban supersite (T0) –  
145 Part 1: Fine particle composition and organic source apportionment, *Atmos. Chem. Phys.*,  
146 2009, **9**, 6633–6653.
- 147 6 C. Struckmeier, F. Drewnick, F. Fachinger, G. P. Gobbi and S. Borrmann, Atmospheric  
148 aerosols in Rome, Italy: sources, dynamics and spatial variations during two seasons, *Atmos.*  
149 *Chem. Phys.*, 2016, **16**, 15277–15299.
- 150 7 X. Ge, A. Setyan, Y. Sun and Q. Zhang, Primary and secondary organic aerosols in Fresno,  
151 California during wintertime: Results from high resolution aerosol mass spectrometry, *J.*  
152 *Geophys. Res. Atmos.*, 2012, **117**, n/a-n/a.
- 153 8 I. M. Ulbrich, M. R. Canagaratna, Q. Zhang, D. R. Worsnop and J. L. Jimenez,  
154 Interpretation of organic components from Positive Matrix Factorization of aerosol mass  
155 spectrometric data, *Atmos. Chem. Phys.*, 2009, **9**, 2891–2918.
- 156 9 S. Weimer, M. R. Alfarra, D. Schreiber, M. Mohr, A. S. H. H. Prévôt and U. Baltensperger,  
157 Organic aerosol mass spectral signatures from wood-burning emissions: Influence of  
158 burning conditions and wood type, *J. Geophys. Res.*, 2008, **113**, 1–10.

- 159 10 J. Schneider, S. Weimer, F. Drewnick, S. Borrmann, G. Helas, P. Gwaze, O. Schmid, M. O.  
160 Andreae and U. Kirchner, Mass spectrometric analysis and aerodynamic properties of  
161 various types of combustion-related aerosol particles, *Int. J. Mass Spectrom.*, 2006, **258**,  
162 37–49.
- 163 11 J. Schneider, F. Freutel, S. R. Zorn, Q. Chen, D. K. Farmer, J. L. Jimenez, S. T. Martin, P.  
164 Artaxo, A. Wiedensohler and S. Borrmann, Mass-spectrometric identification of primary  
165 biological particle markers and application to pristine submicron aerosol measurements in  
166 Amazonia, *Atmos. Chem. Phys.*, 2011, **11**, 11415–11429.
- 167 12 V. A. Lanz, M. R. Alfarra, U. Baltensperger, B. Buchmann, C. Hueglin and A. S. H. Prévôt,  
168 Source apportionment of submicron organic aerosols at an urban site by factor analytical  
169 modelling of aerosol mass spectra, *Atmos. Chem. Phys.*, 2007, **7**, 1503–1522.
- 170 13 M. Elser, R.-J. Huang, R. Wolf, J. G. Slowik, Q. Wang, F. Canonaco, G. Li, C. Bozzetti, K.  
171 R. Daellenbach, Y. Huang, R. Zhang, Z. Li, J. Cao, U. Baltensperger, I. El-Haddad and A.  
172 S. H. Prévôt, New insights into PM<sub>2.5</sub>  
173 chemical composition and sources in two major cities in China during extreme haze events  
174 using aerosol mass spectrometry, *Atmos. Chem. Phys.*, 2016, **16**, 3207–3225.
- 175 14 C. Mohr, P. F. DeCarlo, M. F. Heringa, R. Chirico, J. G. Slowik, R. Richter, C. Reche, a.  
176 Alastuey, X. Querol, R. Seco, J. Peñuelas, J. L. Jiménez, M. Crippa, R. Zimmermann, U.  
177 Baltensperger and a. S. H. Prévôt, Identification and quantification of organic aerosol from  
178 cooking and other sources in Barcelona using aerosol mass spectrometer data, *Atmos. Chem.*  
179 *Phys.*, 2012, **12**, 1649–1665.
- 180 15 S. Saarikoski, S. Carbone, S. Decesari, L. Giulianelli, F. Angelini, M. Canagaratna, N. L.  
181 Ng, a. Trimborn, M. C. Facchini, S. Fuzzi, R. Hillamo and D. Worsnop, Chemical  
182 characterization of springtime submicrometer aerosol in Po Valley, Italy, *Atmos. Chem.*  
183 *Phys.*, 2012, **12**, 8401–8421.
- 184 16 M. Crippa, I. El Haddad, J. G. Slowik, P. F. DeCarlo, C. Mohr, M. F. Heringa, R. Chirico,  
185 N. Marchand, J. Sciare, U. Baltensperger and A. S. H. Prévôt, Identification of marine and  
186 continental aerosol sources in Paris using high resolution aerosol mass spectrometry, *J.*  
187 *Geophys. Res. Atmos.*, 2013, **118**, 1950–1963.
- 188 17 M. E. Jenkin, J. C. Young and A. R. Rickard, The MCM v3.3.1 degradation scheme for  
189 isoprene, *Atmos. Chem. Phys.*, 2015, **15**, 11433–11459.
- 190 18 M. J. Newland, Y. Ren, M. R. McGillen, L. Michelat, V. Daële and A. Mellouki, NO<sub>3</sub>  
191 chemistry of wildfire emissions: a kinetic study of the gas-phase reactions of furans with  
192 the NO<sub>3</sub> radical, *Atmos. Chem. Phys.*, 2022, **22**, 1761–1772.
- 193 19 R. Atkinson, S. M. Aschmann and J. Arey, Reactions of hydroxyl and nitrogen trioxide

194 radicals with phenol, cresols, and 2-nitrophenol at 296  $\pm$  2 K, *Environ. Sci. Technol.*,  
195 1992, **26**, 1397–1403.

196 20 B. Yang, H. Zhang, Y. Wang, P. Zhang, J. Shu, W. Sun and P. Ma, Experimental and  
197 theoretical studies on gas-phase reactions of NO<sub>3</sub> radicals with three methoxyphenols:  
198 Guaiacol, creosol, and syringol, *Atmos. Environ.*, 2016, **125**, 243–251.

199 21 I. Colmenar, B. Cabañas, E. Martínez, M. S. Salgado and P. Martín, Atmospheric fate of a  
200 series of furanaldehydes by their NO<sub>3</sub> reactions, *Atmos. Environ.*, 2012, **54**, 177–184.

201 22 A. Bierbach, I. Barnes and K. H. Becker, Product and kinetic study of the OH-initiated gas-  
202 phase oxidation of Furan, 2-methylfuran and furanaldehydes at  $\approx$  300 K, *Atmos. Environ.*,  
203 1995, **29**, 2651–2660.

204 23 C. Coeur-Tourneur, A. Cassez and J. C. Wenger, Rate Coefficients for the Gas-Phase  
205 Reaction of Hydroxyl Radicals with 2-Methoxyphenol (Guaiacol) and Related Compounds,  
206 *J. Phys. Chem. A*, 2010, **114**, 11645–11650.

207 24 K. S. Docherty, a. C. Aiken, J. a. Huffman, I. M. Ulbrich, P. F. DeCarlo, D. Sueper, D. R.  
208 Worsnop, D. C. Snyder, R. E. Peltier, R. J. Weber, B. D. Grover, D. J. Eatough, B. J.  
209 Williams, a. H. Goldstein, P. J. Ziemann and J. L. Jimenez, The 2005 Study of Organic  
210 Aerosols at Riverside (SOAR-1): instrumental intercomparisons and fine particle  
211 composition, *Atmos. Chem. Phys.*, 2011, **11**, 12387–12420.

212 25 Y.-L. Sun, Q. Zhang, J. J. Schwab, K. L. Demerjian, W.-N. Chen, M.-S. Bae, H.-M. Hung,  
213 O. Hogrefe, B. Frank, O. V. Rattigan and Y.-C. Lin, Characterization of the sources and  
214 processes of organic and inorganic aerosols in New York city with a high-resolution time-  
215 of-flight aerosol mass spectrometer, *Atmos. Chem. Phys.*, 2011, **11**, 1581–1602.

216
